# Supplementary material
Source: HighWire-hosted journal article supplement (https://bmjopen.bmj.com/content/12/1/e049506)
Supplement: inline-supplementary-material-1 [file inline-supplementary-material-1.pdf]

## Supplementary Appendix 1. Methods

### *Continuous variables with non-linear associations*

To represent continuous variables with non-linear relationships to the logit of the outcome, we initially fitted an exploratory predictive model (gam from the mgcv package in R), representing continuous features as thin-plate smoothed splines with the smoothing factor (gamma) set to 1.4 to shrink coefficient degrees of freedom. Based on visual inspection for obvious departure for linearity, if the variable appeared to have a linear relationship with the response term, we represented it as a linear term in variable selection and model testing and training. If the relationship between the response and the variable of interest appeared to be non-linear, we represented the feature as a spline term ("bs" from splines package) with the minimum degrees of freedom (3 d.f.) to avoid overfitting.

## Supplementary Appendix 2: Results

### *28-day mortality outcome: UHB model – analyses exploring different ways of handling of missing data*

We used different methods of handling missing data in order to explore the impact on the model performance: in primary analysis, missing values were imputed; in secondary analysis, missing categories were used. For the 28-day mortality outcome, the model derived using logistic stepwise selection using categorised variables with a missing category (rather than imputed data) gave a slightly higher AUROC (0.805, 95% CI 0.776-0.835); however, it was felt the inclusion of missing categories rather than imputed values might impact generalisability of the model outside the UHB/derivation data context. Other statistical modelling techniques (LASSO, GBM) offered no improvement in model performance and the models would be more difficult to implement in clinical practice. Using continuous predictors modelled using splines where non-linear relationship with the outcome was observed (Supplementary Figure 2) rather than categorising offered a small improvement in model performance (AUROC 0.792, 95% CI 0.762-0.822), but in the interests of clinical utility and interpretability the categorical model was favoured.

### *ITU admission: UHB model – analyses exploring different ways of handling of missing data*

Again, for the ITU admission outcome, use of a missing category rather than imputed missing values improved model performance but was not selected as the final model due to potential problems with generalisability (AUROC 0.960, 95% CI 0.944-0.976). Models using continuous rather than categorical predictors (with splines where relevant; Supplementary Figure 3) gave a small improvement in AUROC (0.910, 95% CI 0.886-0.933), but were deemed less practical.

**Supplementary Table 1. Baseline demographic characteristics, comorbidities and symptoms of participants admitted with COVID-19 in the derivation (University Hospitals Birmingham) and validation (CovidCollab) datasets stratified by intensive therapy unit admission**

|                                       | Development cohort (UHB) |                     |                 | External validation cohort (CovidCollab) |                     |                 |
|---------------------------------------|--------------------------|---------------------|-----------------|------------------------------------------|---------------------|-----------------|
|                                       | Total                    | Not admitted to ITU | Admitted to ITU | Total                                    | Not admitted to ITU | Admitted to ITU |
| N                                     | 1040                     | 857                 | 183             | 6099                                     | 5377                | 722             |
| Age category (years), n (%)           |                          |                     |                 |                                          |                     |                 |
| <30                                   | 35 (3.4)                 | 29 (3.4)            | 6 (3.3)         | 125 (2.0)                                | 102 (1.9)           | 23 (3.2)        |
| 30-39                                 | 42 (4.0)                 | 29 (3.4)            | 13 (7.1)        | 270 (4.4)                                | 228 (4.2)           | 42 (5.8)        |
| 40-49                                 | 91 (8.8)                 | 63 (7.4)            | 28 (15.3)       | 497 (8.1)                                | 388 (7.2)           | 109 (15.1)      |
| 50-59                                 | 146 (14.0)               | 90 (10.5)           | 56 (30.6)       | 793 (13.0)                               | 615 (11.4)          | 178 (24.7)      |
| 60-69                                 | 181 (17.4)               | 136 (15.9)          | 45 (24.6)       | 944 (15.5)                               | 751 (14.0)          | 193 (26.7)      |
| 70-79                                 | 220 (21.2)               | 189 (22.1)          | 31 (16.9)       | 1325 (21.7)                              | 1185 (22.0)         | 140 (19.4)      |
| 80-89                                 | 214 (20.6)               | 210 (24.5)          | 4 (2.2)         | 1571 (25.8)                              | 1535 (28.5)         | 36 (5.0)        |
| ≥90                                   | 111 (10.7)               | 111 (13.0)          | 0 (0.0)         | 574 (9.4)                                | 573 (10.7)          | 1 (0.1)         |
| Gender (male), n (%)                  | 589 (56.6)               | 456 (53.2)          | 133 (72.7)      | 3361 (55.1)                              | 2877 (53.5)         | 484 (67.0)      |
| Ethnicity, n (%)                      |                          |                     |                 | Not available                            |                     |                 |
| White                                 | 590 (56.7)               | 519 (60.6)          | 71 (38.8)       |                                          |                     |                 |
| South Asian                           | 127 (12.2)               | 99 (11.6)           | 28 (15.3)       |                                          |                     |                 |
| Black                                 | 68 (6.5)                 | 56 (6.5)            | 12 (6.6)        |                                          |                     |                 |
| Other                                 | 255 (24.5)               | 183 (21.4)          | 72 (39.3)       |                                          |                     |                 |
| Comorbidities, n (%)                  |                          |                     |                 |                                          |                     |                 |
| Dementia                              | 373 (35.9)               | 297 (34.7)          | 76 (41.5)       | 934 (15.3)                               | 925 (17.2)          | 9 (1.2)         |
| Cancer                                | 135 (13.0)               | 124 (14.5)          | 11 (6.0)        | 649 (10.6)                               | 585 (10.9)          | 64 (8.9)        |
| Asthma                                | 165 (15.9)               | 139 (16.2)          | 26 (14.2)       | 1579 (25.9)*                             | 1404 (26.1)*        | 175 (24.2)*     |
| Chronic obstructive pulmonary disease | 283 (27.2)               | 241 (28.1)          | 42 (23.0)       |                                          |                     |                 |
| Sleep apnoea                          | 49 (4.7)                 | 42 (4.9)            | 7 (3.8)         |                                          |                     |                 |
| Cardiovascular disease                | 567 (54.5)               | 479 (55.9)          | 88 (48.1)       | 3033 (49.7)                              | 2719 (50.6)         | 314 (43.5)      |
| Hypertension                          | 661 (63.6)               | 539 (62.9)          | 122 (66.7)      | Not available                            |                     |                 |
| Diabetes without complications        | 258 (24.8)               | 202 (23.6)          | 56 (30.6)       | 1794 (29.4)                              | 1559 (29.0)         | 235 (32.5)      |
| Diabetes with complications           | 112 (10.8)               | 103 (12.0)          | 9 (4.9)         | Not available                            |                     |                 |
| Peptic ulcer                          | 29 (2.8)                 | 26 (3.0)            | 3 (1.6)         | Not available                            |                     |                 |
| Liver disease                         | 71 (6.8)                 | 60 (7.0)            | 11 (6.0)        | Not available                            |                     |                 |
| Rheumatic/inflammatory disease        | 51 (4.9)                 | 49 (5.7)            | 2 (1.1)         | Not available                            |                     |                 |
| Thyroid disorder                      | 107 (10.3)               | 100 (11.7)          | 7 (3.8)         | Not available                            |                     |                 |
| ISARIC comorbidity score              |                          |                     |                 | Not applicable                           |                     |                 |
| 0                                     | 111 (10.7)               | 92 (10.7)           | 19 (10.4)       |                                          |                     |                 |
| 1                                     | 234 (22.5)               | 176 (20.5)          | 58 (31.7)       |                                          |                     |                 |
| ≥2                                    | 695 (66.8)               | 589 (68.7)          | 106 (57.9)      |                                          |                     |                 |
| Symptoms, n (%)                       |                          |                     |                 |                                          |                     |                 |
| Breathlessness                        | 559 (59.2)               | 424 (54.7)          | 135 (79.9)      | Not available                            |                     |                 |
| Chest pain                            | 39 (4.1)                 | 29 (3.7)            | 10 (5.9)        | Not available                            |                     |                 |
| Cough                                 | 538 (57.0)               | 415 (53.5)          | 123 (72.8)      | 4259 (69.8)                              | 3646 (67.8)         | 613 (84.9)      |
| Fever                                 | 465 (49.3)               | 357 (46.1)          | 108 (63.9)      | 3212 (52.7)                              | 2694 (50.1)         | 518 (71.7)      |
| Headache                              | 42 (4.4)                 | 30 (3.9)            | 12 (7.1)        | Not available                            |                     |                 |
| Malaise                               | 186 (19.7)               | 144 (18.6)          | 42 (24.9)       | Not available                            |                     |                 |
| New onset diarrhoea or vomiting       | 56 (5.9)                 | 49 (6.3)            | 7 (4.1)         | Not available                            |                     |                 |
| Sputum                                | 84 (8.9)                 | 60 (7.7)            | 24 (14.2)       | Not available                            |                     |                 |
| Delirium                              | 80 (8.5)                 | 77 (9.9)            | 3 (1.8)         | 1160 (20.1)                              | 1085 (21.3)         | 75 (10.9)       |
| Outcomes                              |                          |                     |                 |                                          |                     |                 |
| Died within 28 days of admission      | 288 (27.7)               | 237 (27.7)          | 51 (27.9)       | 1668 (27.3)                              | 1423 (26.5)         | 245 (33.9)      |
| ITU admission within 28 days          | 183 (17.6)               | 0 (0.0)             | 183 (100.0)     | 722 (11.8)                               | 0 (0.0)             | 722 (100.0)     |

\*In CovidCollab, asthma, chronic obstructive pulmonary disease and sleep apnoea were combined as 'respiratory diseases'; data on the individual conditions was not available, therefore the n (%) given is for all respiratory diseases.

**Supplementary Table 2. Area under the receiver operating characteristic curve (AUROC) for each of the models assessed in the derivation dataset (University Hospitals Birmingham) for predicting death within 28 days of hospital admission**

| Model    | Continuous data | Missing continuous data | Candidate predictors included    | AUROC (95% CI)      |
|----------|-----------------|-------------------------|----------------------------------|---------------------|
| Logistic | Categorical     | Imputed                 | All                              | 0.743 (0.702-0.783) |
| LASSO    | Categorical     | Imputed                 | All                              | 0.755 (0.720-0.791) |
| GBM      | Categorical     | Imputed                 | All                              | 0.758 (0.719-0.797) |
| Logistic | Categorical     | Imputed                 | Stepwise selection               | 0.779 (0.744-0.813) |
| Logistic | Categorical     | Imputed                 | All plus comorbidities           | 0.730 (0.688-0.773) |
| Logistic | Categorical     | Imputed                 | Demographic only                 | 0.709 (0.676-0.742) |
| Logistic | Categorical     | Missing category        | All                              | 0.773 (0.740-0.806) |
| Logistic | Categorical     | Missing category        | Demographic only                 | 0.705 (0.670-0.740) |
| Logistic | Categorical     | Missing category        | Stepwise selection               | 0.805 (0.776-0.835) |
| LASSO    | Categorical     | Missing category        | All                              | 0.786 (0.750-0.823) |
| GBM      | Categorical     | Missing category        | All                              | 0.778 (0.745-0.811) |
| Logistic | Continuous      | Imputed                 | All                              | 0.768 (0.734-0.802) |
| Logistic | Continuous      | Imputed                 | All with splines*                | 0.730 (0.652-0.807) |
| LASSO    | Continuous      | Imputed                 | All                              | 0.778 (0.745-0.811) |
| LASSO    | Continuous      | Imputed                 | All with splines*                | 0.786 (0.755-0.817) |
| GBM      | Continuous      | Imputed                 | All                              | 0.783 (0.750-0.816) |
| GBM      | Continuous      | Imputed                 | All with splines*                | 0.775 (0.742-0.809) |
| Logistic | Continuous      | Imputed                 | Stepwise selection               | 0.794 (0.765-0.824) |
| Logistic | Continuous      | Imputed                 | Stepwise selection with splines* | 0.792 (0.762-0.822) |

All = all demographic, symptoms, vital signs/physiological measures, and laboratory test result candidate predictors. \*Splines were used to model continuous variables where non-linear associations with the outcome were observed. LASSO = least absolute shrinkage and selection operator; GBM = gradient boosting machine.

**Supplementary Table 3. Logistic regression model coefficients for mortality within 28 days of admission in the derivation dataset (University Hospitals Birmingham)**

Logistic regression equation:

$$\ln\left(\frac{p}{1-p}\right) = \beta_0 + \sum_{i=1}^m \beta_i x_i$$

Where  $p$  is probability,  $\beta_0$  is the intercept (constant term), and  $\beta_i$  are the coefficients for each of the predictors  $x_i$ .

To calculate probability ( $p$ ):

$$p = \frac{1}{1 + e^{-(\beta_0 + \sum_{i=1}^m \beta_i x_i)}}$$

| Predictor                                                           | Coefficient (95% CI)     |
|---------------------------------------------------------------------|--------------------------|
| Intercept                                                           | -4.143 (-5.269--3.018)   |
| Age category (years), n (%)                                         |                          |
| <30                                                                 | -13.985 (-746.83-718.86) |
| 30-39                                                               | -0.609 (-1.929-0.710)    |
| 40-49                                                               | -1.353 (-2.557--0.149)   |
| 50-59                                                               | Ref                      |
| 60-69                                                               | 0.201 (-0.438-0.839)     |
| 70-79                                                               | 0.978 (0.364-1.591)      |
| 80-89                                                               | 1.353 (0.691-2.014)      |
| ≥90                                                                 | 1.705 (0.960-2.451)      |
| Breathlessness                                                      | 0.310 (-0.086-0.706)     |
| Sputum                                                              | 0.383 (-0.187-0.952)     |
| Temperature (Celsius), n (%)                                        |                          |
| <37.8                                                               | Ref                      |
| ≥37.8                                                               | 0.286 (-0.161-0.733)     |
| Systolic blood pressure (mm Hg), n (%)                              |                          |
| <140                                                                | Ref                      |
| ≥140                                                                | -0.340 (-0.695-0.016)    |
| Respirations (per minute), n (%)                                    |                          |
| <20                                                                 | Ref                      |
| ≥20                                                                 | 0.405 (0.035-0.775)      |
| Oxygen saturation (%), n (%)                                        |                          |
| <80                                                                 | 1.042 (-0.503-2.588)     |
| 80-88                                                               | 1.425 (0.699-2.151)      |
| 89-93                                                               | 0.332 (-0.085-0.749)     |
| ≥94                                                                 | Ref                      |
| Portable oxygen concentrator fraction of inspired oxygen (%), n (%) |                          |
| ≤0.28                                                               | Ref                      |

|                                                    |                        |
|----------------------------------------------------|------------------------|
| 0.28-0.49                                          | 0.624 (-0.069-1.316)   |
| ≥0.5                                               | 0.564 (-0.021-1.149)   |
| pH, n (%)                                          |                        |
| <7.30                                              | 0.344 (-0.308-0.997)   |
| 7.30-7.34                                          | -0.347 (-0.931-0.238)  |
| 7.35-7.44                                          | Ref                    |
| ≥7.45                                              | 0.088 (-0.386-0.561)   |
| White blood cell count (10 <sup>9</sup> /l), n (%) |                        |
| <3.9                                               | -0.872 (-1.649--0.095) |
| 3.9-10.8                                           | Ref                    |
| ≥10.9                                              | 0.158 (-0.252-0.568)   |
| Platelets (10 <sup>9</sup> /l), n (%)              |                        |
| <150                                               | 0.442 (-0.007-0.892)   |
| 150-399                                            | Ref                    |
| ≥400                                               | -0.393 (-1.051-0.265)  |
| C-reactive protein (mg/l), n (%)                   |                        |
| <10                                                | Ref                    |
| 10-99                                              | 0.613 (-0.312-1.538)   |
| ≥100                                               | 1.013 (0.109-1.917)    |
| Glucose (mmol/l), n (%)                            |                        |
| <7.8                                               | Ref                    |
| 7.8-8.4                                            | 0.559 (-0.016-1.135)   |
| ≥8.5                                               | 0.359 (-0.005-0.723)   |
| Alkaline phosphatase (U/l), n (%)                  |                        |
| <130                                               | Ref                    |
| ≥130                                               | 0.327 (-0.095-0.750)   |
| Urea (mmol/l), n (%)                               |                        |
| <7.8                                               | Ref                    |
| ≥7.8                                               | 0.386 (0.035-0.738)    |
| Corrected calcium (mmol/l), n (%)                  |                        |
| <2.2                                               | 0.575 (0.092-1.058)    |
| 2.2-2.5                                            | Ref                    |
| ≥2.6                                               | 1.057 (0.265-1.849)    |
| Eosinophils (10 <sup>9</sup> /l), n (%)            |                        |
| ≤0.4                                               | Ref                    |
| >0.4                                               | -1.512 (-3.654-0.630)  |
| Frailty score, n (%)                               |                        |
| 1-3                                                | Ref                    |
| 4-6                                                | 0.345 (-0.231-0.920)   |
| 7-9                                                | 0.738 (0.113-1.363)    |

**Supplementary Table 4. Area under the receiver operating characteristic curve (AUROC) for each of the models assessed in the derivation dataset (University Hospitals Birmingham) for predicting intensive therapy unit admission within 28 days of hospital admission**

| Model    | Continuous data | Missing continuous data | Candidate predictors included    | AUROC (95% CI)      |
|----------|-----------------|-------------------------|----------------------------------|---------------------|
| Logistic | Categorical     | Imputed                 | All                              | 0.854 (0.824-0.885) |
| LASSO    | Categorical     | Imputed                 | All                              | 0.877 (0.848-0.906) |
| GBM      | Categorical     | Imputed                 | All                              | 0.874 (0.844-0.904) |
| Logistic | Categorical     | Imputed                 | Stepwise selection               | 0.893 (0.864-0.922) |
| Logistic | Categorical     | Imputed                 | All plus comorbidities           | 0.872 (0.835-0.909) |
| Logistic | Categorical     | Imputed                 | Demographic only                 | 0.766 (0.732-0.799) |
| Logistic | Categorical     | Missing category        | All                              | 0.909 (0.858-0.960) |
| Logistic | Categorical     | Missing category        | Demographic only                 | 0.764 (0.731-0.798) |
| Logistic | Categorical     | Missing category        | Stepwise selection               | 0.960 (0.944-0.976) |
| LASSO    | Categorical     | Missing category        | All                              | 0.961 (0.946-0.976) |
| GBM      | Categorical     | Missing category        | All                              | 0.956 (0.939-0.973) |
| Logistic | Continuous      | Imputed                 | All                              | 0.869 (0.837-0.901) |
| Logistic | Continuous      | Imputed                 | All with splines*                | 0.892 (0.865-0.920) |
| LASSO    | Continuous      | Imputed                 | All                              | 0.888 (0.860-0.915) |
| LASSO    | Continuous      | Imputed                 | All with splines*                | 0.903 (0.878-0.928) |
| GBM      | Continuous      | Imputed                 | All                              | 0.896 (0.869-0.923) |
| GBM      | Continuous      | Imputed                 | All with splines*                | 0.899 (0.874-0.924) |
| Logistic | Continuous      | Imputed                 | Stepwise selection               | 0.895 (0.869-0.922) |
| Logistic | Continuous      | Imputed                 | Stepwise selection with splines* | 0.910 (0.886-0.933) |

All = all demographic, symptoms, vital signs/physiological measures, and laboratory test result candidate predictors. \*Splines were used to model continuous variables where non-linear associations with the outcome were observed. LASSO = least absolute shrinkage and selection operator; GBM = gradient boosting machine.

**Supplementary Table 5. Logistic regression model coefficients for intensive therapy unit admission within 28 days of hospital admission in the derivation dataset (University Hospitals Birmingham)**

| Predictor                                                           | Coefficient (95% CI)       |
|---------------------------------------------------------------------|----------------------------|
| Intercept                                                           | -0.459 (-2.077-1.159)      |
| Age category (years), n (%)                                         |                            |
| <30                                                                 | -0.635 (-1.913-0.644)      |
| 30-39                                                               | -0.603 (-1.655-0.449)      |
| 40-49                                                               | -0.291 (-1.050-0.469)      |
| 50-59                                                               | Ref                        |
| 60-69                                                               | -0.734 (-1.390--0.078)     |
| 70-79                                                               | -1.296 (-2.005--0.588)     |
| 80-89                                                               | -3.445 (-4.693--2.197)     |
| ≥90                                                                 | -17.026 (-1075.95-1041.90) |
| Sex (male)                                                          | 0.720 (0.214-1.226)        |
| Fever                                                               | 0.277 (-0.319-0.873)       |
| New onset diarrhoea or vomiting                                     | -0.937 (-2.090-0.217)      |
| Temperature (Celsius), n (%)                                        |                            |
| <37.8                                                               | Ref                        |
| ≥37.8                                                               | 0.619 (0.059-1.178)        |
| Heart rate category (beats per minute), n (%)                       |                            |
| <80                                                                 | Ref                        |
| 80-99                                                               | -0.634 (-1.270-0.003)      |
| ≥100                                                                | -0.902 (-1.594--0.209)     |
| Respirations (per minute), n (%)                                    |                            |
| <20                                                                 | Ref                        |
| ≥20                                                                 | 0.799 (0.151-1.447)        |
| Portable oxygen concentrator fraction of inspired oxygen (%), n (%) |                            |
| ≤0.28                                                               | Ref                        |
| 0.28-0.49                                                           | 1.244 (0.357-2.131)        |
| ≥0.5                                                                | 1.505 (0.686-2.324)        |
| pH, n (%)                                                           |                            |
| <7.30                                                               | 1.809 (0.861-2.757)        |
| 7.30-7.34                                                           | -0.104 (-0.958-0.750)      |
| 7.35-7.44                                                           | Ref                        |
| ≥7.45                                                               | 0.530 (-0.063-1.123)       |
| White blood cell count (10 <sup>9</sup> /l), n (%)                  |                            |
| <3.9                                                                | -0.650 (-1.657-0.356)      |
| 3.9-10.8                                                            | Ref                        |
| ≥10.9                                                               | 1.372 (0.717-2.027)        |
| C-reactive protein (mg/l), n (%)                                    |                            |
| <10                                                                 | Ref                        |
| 10-99                                                               | 0.227 (-0.913-1.367)       |
| ≥100                                                                | 0.537 (-0.657-1.732)       |
| Albumin (g/l), n (%)                                                |                            |
| <25                                                                 | Ref                        |

|                                       |                        |
|---------------------------------------|------------------------|
| 25-34                                 | -0.881 (-1.550--0.212) |
| ≥35                                   | -1.037 (-1.936--0.138) |
| Monocytes (10 <sup>9</sup> /l), n (%) |                        |
| <0.2                                  | Ref                    |
| 0.2-0.8                               | 0.101 (-0.733-0.936)   |
| >0.8                                  | -0.972 (-2.067-0.122)  |
| eGFR (ml/min), n (%)                  |                        |
| <30 (Stage 4 or above)                | -0.731 (-1.506-0.045)  |
| 30-59 (Stage 3)                       | 0.323 (-0.435-1.082)   |
| 60-89 (Stage 2)                       | -0.164 (-0.731-0.402)  |
| >90 (Normal or high)                  | Ref                    |
| Frailty score, n (%)                  |                        |
| 1-3                                   | Ref                    |
| 4-6                                   | -0.522 (-1.047-0.002)  |
| 7-9                                   | -2.080 (-3.117--1.044) |
| Glasgow Coma Scale score, n (%)       |                        |
| <15                                   | Ref                    |
| 15                                    | -1.348 (-1.896--0.801) |

**Supplementary Table 6. Logistic regression model coefficients for the external validation/reduced model (UHB-R) for mortality within 28 days of hospital admission (developed in University Hospitals Birmingham data and validated in CovidCollab)**

| Predictor                                                           | Coefficient (95% CI)     |
|---------------------------------------------------------------------|--------------------------|
| Intercept                                                           | -3.730 (-4.848--2.611)   |
| Age category (years), n (%)                                         |                          |
| <30                                                                 | -14.108 (-766.78-738.56) |
| 30-39                                                               | -0.617 (-1.922-0.689)    |
| 40-49                                                               | -1.333 (-2.487--0.178)   |
| 50-59                                                               | Ref                      |
| 60-69                                                               | 0.203 (-0.421-0.828)     |
| 70-79                                                               | 0.925 (0.324-1.526)      |
| 80-89                                                               | 1.204 (0.569-1.838)      |
| ≥90                                                                 | 1.590 (0.866-2.313)      |
| Temperature (Celsius), n (%)                                        |                          |
| <37.8                                                               | Ref                      |
| ≥37.8                                                               | 0.336 (-0.101-0.773)     |
| Systolic blood pressure (mm Hg), n (%)                              |                          |
| <140                                                                | Ref                      |
| ≥140                                                                | -0.353 (-0.691--0.015)   |
| Respirations (per minute), n (%)                                    |                          |
| <20                                                                 | Ref                      |
| ≥20                                                                 | 0.462 (0.120-0.804)      |
| Oxygen saturation (%), n (%)                                        |                          |
| <80                                                                 | 1.028 (-0.525-2.580)     |
| 80-88                                                               | 1.491 (0.788-2.194)      |
| 89-93                                                               | 0.480 (0.084-0.876)      |
| ≥94                                                                 | Ref                      |
| Portable oxygen concentrator fraction of inspired oxygen (%), n (%) |                          |
| ≤0.28                                                               | Ref                      |
| 0.28-0.49                                                           | 0.667 (0.027-1.307)      |
| ≥0.5                                                                | 0.588 (0.028-1.148)      |
| pH, n (%)                                                           |                          |
| <7.30                                                               | 0.412 (-0.217-1.042)     |
| 7.30-7.34                                                           | -0.262 (-0.809-0.284)    |
| 7.35-7.44                                                           | Ref                      |
| ≥7.45                                                               | 0.186 (-0.269-0.640)     |
| C-reactive protein (mg/l), n (%)                                    |                          |
| <10                                                                 | Ref                      |
| 10-99                                                               | 0.721 (-0.172-1.615)     |
| ≥100                                                                | 1.167 (0.301-2.033)      |
| Urea (mmol/l), n (%)                                                |                          |
| <7.8                                                                | Ref                      |
| ≥7.8                                                                | 0.494 (0.159-0.828)      |
| Frailty score, n (%)                                                |                          |

|     |                      |
|-----|----------------------|
| 1-3 | Ref                  |
| 4-6 | 0.333 (-0.228-0.895) |
| 7-9 | 0.685 (0.072-1.297)  |

**Supplementary Table 7. Logistic regression model coefficients for the external validation/reduced model (UHB-R) model for intensive therapy unit admission within 28 days of hospital admission (developed in University Hospitals Birmingham data and validated in CovidCollab)**

| Predictor                                                           | Coefficient (95% CI)       |
|---------------------------------------------------------------------|----------------------------|
| Intercept                                                           | -2.482 (-4.012--0.951)     |
| Age category (years), n (%)                                         |                            |
| <30                                                                 | -0.688 (-1.859-0.483)      |
| 30-39                                                               | -0.534 (-1.531-0.464)      |
| 40-49                                                               | -0.253 (-0.975-0.470)      |
| 50-59                                                               | Ref                        |
| 60-69                                                               | -0.648 (-1.274--0.021)     |
| 70-79                                                               | -1.080 (-1.745--0.416)     |
| 80-89                                                               | -3.035 (-4.233--1.837)     |
| ≥90                                                                 | -16.756 (-1103.28-1069.77) |
| Sex (male)                                                          | 0.608 (0.112-1.105)        |
| Fever                                                               | 0.279 (-0.267-0.824)       |
| Respirations (per minute), n (%)                                    |                            |
| <20                                                                 | Ref                        |
| ≥20                                                                 | 0.648 (0.052-1.245)        |
| Portable oxygen concentrator fraction of inspired oxygen (%), n (%) |                            |
| ≤0.28                                                               | Ref                        |
| 0.28-0.49                                                           | 1.205 (0.392-2.018)        |
| ≥0.5                                                                | 1.703 (1.011-2.396)        |
| pH, n (%)                                                           |                            |
| <7.30                                                               | 1.838 (0.917-2.759)        |
| 7.30-7.34                                                           | 0.125 (-0.655-0.905)       |
| 7.35-7.44                                                           | Ref                        |
| ≥7.45                                                               | 0.621 (0.047-1.196)        |
| C-reactive protein (mg/l), n (%)                                    |                            |
| <10                                                                 | Ref                        |
| 10-99                                                               | -0.046 (-1.116-1.023)      |
| ≥100                                                                | 0.456 (-0.632-1.544)       |
| Neutrophil:lymphocyte ratio, n (%)                                  |                            |
| <2.21                                                               | Ref                        |
| 2.21-4.82                                                           | 0.959 (-0.159-2.077)       |
| >4.82                                                               | 1.305 (0.212-2.399)        |
| eGFR (ml/min), n (%)                                                |                            |
| <30 (Stage 4 or above)                                              | -0.598 (-1.331-0.136)      |
| 30-59 (Stage 3)                                                     | 0.300 (-0.385-0.985)       |
| 60-89 (Stage 2)                                                     | -0.253 (-0.780-0.275)      |
| >90 (Normal or high)                                                | Ref                        |
| Frailty score, n (%)                                                |                            |
| 1-3                                                                 | Ref                        |
| 4-6                                                                 | -0.475 (-0.979-0.028)      |
| 7-9                                                                 | -1.991 (-3.025--0.957)     |

| Glasgow Coma Scale score, n (%) |                        | Ref |
|---------------------------------|------------------------|-----|
| <15                             |                        |     |
| 15                              | -1.310 (-1.821--0.798) |     |

**Supplementary Table 8. Sensitivity analysis – complete case analysis and exploration of different numbers of missing candidate predictors: Area under the receiver operating characteristic curve (AUROC) in the University Hospitals Birmingham dataset for predicting mortality and intensive therapy unit admission within 28 days of hospital admission**

| Number of missing predictor variables per patient | n   | Outcome             |                     |
|---------------------------------------------------|-----|---------------------|---------------------|
|                                                   |     | Death               | ITU                 |
| 0                                                 | 224 | 0.696 (0.597-0.795) | 0.892 (0.844-0.940) |
| 0-1                                               | 471 | 0.760 (0.708-0.812) | 0.880 (0.846-0.915) |
| 0-2                                               | 564 | 0.763 (0.715-0.812) | 0.877 (0.842-0.911) |
| 0-5                                               | 643 | 0.756 (0.712-0.799) | 0.886 (0.854-0.918) |
| 0-10                                              | 911 | 0.772 (0.739-0.806) | 0.885 (0.857-0.914) |

**Supplementary Table 9. Sensitivity analysis – stratification by gender and age category: Area under the receiver operating characteristic curve (AUROC) in the University Hospitals Birmingham dataset for predicting mortality and intensive therapy unit admission within 28 days of hospital admission, using the reduced UHB-R model**

| Model                          |           | Outcome             |                     |
|--------------------------------|-----------|---------------------|---------------------|
| Derivation/Train               | Test      | Death               | ITU                 |
| <b>Gender-stratified</b>       |           |                     |                     |
| UHB-R (fitted on all patients) | Male      | 0.775 (0.726-0.823) | 0.897 (0.856-0.937) |
| UHB-R (fitted on all patients) | Female    | 0.755 (0.706-0.804) | 0.873 (0.833-0.913) |
| <b>Age-stratified</b>          |           |                     |                     |
| UHB-R (fitted on all patients) | ≤60 years | 0.730 (0.638-0.823) | 0.845 (0.761-0.930) |
| UHB-R (fitted on all patients) | >60 years | 0.778 (0.722-0.834) | 0.897 (0.864-0.930) |

#### Supplementary figure legends:

Supplementary Figure 1. Calibration plot (observed probability (y-axis) against predicted probability (x-axis)) for ISARIC 4C score in UHB dataset (mortality outcome).

Supplementary Figure 2. Exploration of non-linear relationships between continuous predictors and 28-day mortality using general additive models (GAM); splines (continuous smoothed predictors) were included in the models where a non-linear relationship was observed.

Supplementary Figure 3. Exploration of non-linear relationships between continuous predictors and intensive therapy unit admission using general additive models (GAM); splines (continuous smoothed predictors) were included in the models where a non-linear relationship was observed.

Supplementary Figure 4. Forest plot of logistic regression coefficients for days 0-7 from admission for mortality outcome.
